# Supplementary material for: The Effect of the Stress-Signalling Mediator Triacontanol on Biochemical and Physiological Modifications in Dracocephalum forrestii Culture
Source: MDPI journal article supplement (doi:10.3390/ijms232315147), 2022-12-02
Supplement: s1 [file s1]

**Table S1.** Primers used in ISSR-PCR analysis of *Dracocephalum forrestii* shoot treatments.

| Primer Code | Primer Sequence<br>5' → 3' | Annealing Temperature | Number of bands for treatment<br>(Growth regulator combination) |      |             |           |            |                |              |               |
|-------------|----------------------------|-----------------------|-----------------------------------------------------------------|------|-------------|-----------|------------|----------------|--------------|---------------|
|             |                            |                       | C                                                               | C-BI | TRIA<br>2.5 | TRIA<br>5 | TRIA<br>10 | TRIA<br>2.5-BI | TRIA<br>5-BI | TRIA<br>10-BI |
| ISSR-X2     | CTCCTCCTCCTCRC*            | 45°C                  | 3                                                               | 3    | 3           | 3         | 3          | 3              | 3            | 3             |
| UBC808      | AGAGAGAGAGAGAGAGC          | 48°C                  | 6                                                               | 6    | 6           | 6         | 6          | 6              | 6            | 6             |
| UBC809      | AGAGAGAGAGAGAGAGG          | 48°C                  | 5                                                               | 5    | 5           | 5         | 5          | 5              | 5            | 5             |
| UBC840      | GAGAGAGAGAGAGAGAYT*        | 48°C                  | 7                                                               | 7    | 7           | 7         | 7          | 7              | 7            | 7             |
| UBC 818     | CACACACACACACACAG          | 48°C                  | 5                                                               | 5    | 5           | 5         | 5          | 5              | 5            | 5             |
| UBC 834     | AGAGAGAGAGAGAGAGYT*        | 48°C                  | 7                                                               | 7    | 7           | 7         | 7          | 7              | 7            | 7             |

\* Y = C or T; R = A or G.
